# Supplementary material for: Associations of Maternal Consumption of Dairy Products during Pregnancy with Perinatal Fatty Acids Profile in the EDEN Cohort Study
Source: MDPI journal article supplement (doi:10.3390/nu14081636), 2022-04-14
Supplement: s1 [file s1]

**Table S1.** Comparison of included and non-included participants characteristic<sup>1</sup>

|                                              | Maternal blood |           |          |              |                       | Cord blood |          |          |              |                       | Colostrum |          |          |              |                       |
|----------------------------------------------|----------------|-----------|----------|--------------|-----------------------|------------|----------|----------|--------------|-----------------------|-----------|----------|----------|--------------|-----------------------|
|                                              | <i>n</i>       | Included  | <i>n</i> | Non-included | <i>p</i> <sup>2</sup> | <i>n</i>   | Included | <i>n</i> | Non-included | <i>p</i> <sup>2</sup> | <i>n</i>  | Included | <i>n</i> | Non-included | <i>p</i> <sup>2</sup> |
| Poitiers, %                                  | 1754           | 50 (869)  | 248      | 40 (99)      | 0.004                 | 1337       | 53 (708) | 665      | 39 (260)     | <0.0002               | 1123      | 34 (299) | 879      | 60 (669)     | <0.0002               |
| Age at delivery (years)                      | 1754           | 29 (5)    | 153      | 29 (5)       | 0.67                  | 1337       | 29 (5)   | 570      | 29 (5)       | 0.71                  | 1028      | 30 (5)   | 879      | 29 (5)       | 0.23                  |
| Educational attainment, %                    | 1741           |           | 169      |              | 0.001                 | 1326       |          | 584      |              | 0.02                  | 1038      |          | 872      |              | <0.0001               |
| <high school diploma                         |                | 27 (478)  |          | 42 (71)      |                       |            | 27 (357) |          | 33 (192)     |                       |           | 22 (189) |          | 35 (360)     |                       |
| high school diploma                          |                | 18 (314)  |          | 15 (26)      |                       |            | 17 (232) |          | 18 (108)     |                       |           | 15 (135) |          | 20 (205)     |                       |
| 2-year university degree                     |                | 22 (384)  |          | 18 (30)      |                       |            | 23 (305) |          | 19 (109)     |                       |           | 25 (214) |          | 19 (200)     |                       |
| >2-year university degree                    |                | 32 (565)  |          | 25 (42)      |                       |            | 33 (432) |          | 30 (175)     |                       |           | 38 (334) |          | 26 (273)     |                       |
| Monthly household income, %                  | 1744           |           | 169      |              | 0.002                 | 1327       |          | 586      |              | 0.90                  | 1040      |          | 873      |              | <0.0001               |
| <1500 €                                      |                | 16 (287)  |          | 24 (40)      |                       |            | 17 (225) |          | 17 (102)     |                       |           | 13 (111) |          | 21 (216)     |                       |
| 1500-2300 €                                  |                | 29 (506)  |          | 37 (62)      |                       |            | 29 (390) |          | 30 (178)     |                       |           | 27 (240) |          | 32 (328)     |                       |
| 2301-3000 €                                  |                | 27 (466)  |          | 21 (35)      |                       |            | 27 (354) |          | 25 (147)     |                       |           | 27 (237) |          | 25 (264)     |                       |
| >3000 €                                      |                | 28 (485)  |          | 19 (32)      |                       |            | 27 (358) |          | 27 (159)     |                       |           | 33 (285) |          | 22 (232)     |                       |
| BMI before pregnancy (kg/m <sup>2</sup> ), % | 1727           |           | 157      |              | 0.44                  | 1310       |          | 574      |              | 0.05                  | 1018      |          | 866      |              | <0.0001               |
| <18.5                                        |                | 8 (146)   |          | 10 (15)      |                       |            | 9 (120)  |          | 7 (41)       |                       |           | 10 (83)  |          | 8 (78)       |                       |
| 18.5-24.9                                    |                | 66 (1134) |          | 59 (93)      |                       |            | 66 (866) |          | 63 (361)     |                       |           | 70 (602) |          | 61 (625)     |                       |
| 25.0-29.9                                    |                | 17 (298)  |          | 20 (32)      |                       |            | 17 (221) |          | 19 (109)     |                       |           | 14 (120) |          | 21 (210)     |                       |
| ≥30.0                                        |                | 9 (149)   |          | 11 (17)      |                       |            | 8 (103)  |          | 11 (63)      |                       |           | 7 (61)   |          | 10 (105)     |                       |
| Gestational diabetes, %                      | 1753           | 6 (110)   | 151      | 9 (13)       | 0.26                  | 1336       | 6 (85)   | 568      | 7 (38)       | 0.79                  | 1026      | 6 (49)   | 878      | 7 (74)       | 0.15                  |
| Hypertensive disorders during pregnancy, %   | 1753           |           | 151      |              | 0.96                  | 1336       |          | 568      |              | 0.47                  | 1026      |          | 878      |              | 0.07                  |
| Gestational hypertension                     |                | 3 (51)    |          | 3 (5)        |                       |            | 3 (36)   |          | 4 (20)       |                       |           | 3 (30)   |          | 3 (26)       |                       |
| Preeclampsia                                 |                | 2 (37)    |          | 2 (3)        |                       |            | 2 (26)   |          | 2 (14)       |                       |           | 1 (12)   |          | 3 (28)       |                       |
| Smoking during pregnancy, %                  | 1712           | 26 (450)  | 135      | 25 (34)      | 0.78                  | 1304       | 27 (351) | 543      | 24 (133)     | 0.28                  | 983       | 23 (199) | 864      | 29 (285)     | 0.004                 |
| Any breastfeeding duration (months), %       | 1749           |           | 142      |              | 0.80                  |            |          |          |              |                       | 1016      |          | 875      |              | <0.0001               |
| Never                                        |                | 27 (477)  |          | 26 (37)      |                       |            | 29 (384) | 557      | 23 (130)     | 0.12                  |           | 0 (1)    |          | 50 (513)     |                       |

|         |          |         |          |          |          |          |
|---------|----------|---------|----------|----------|----------|----------|
| < 3.0   | 27 (464) | 27 (38) | 26 (346) | 28 (156) | 34 (296) | 20 (206) |
| 3.0-5.9 | 23 (398) | 26 (37) | 23 (301) | 24 (134) | 32 (284) | 15 (151) |
| ≥ 6.0   | 23 (410) | 21 (30) | 23 (303) | 25 (137) | 34 (294) | 14 (146) |

---

<sup>1</sup> Values are the mean ± SD or % (*n*). <sup>2</sup> Student's t-test and Chi-square. Significance level was set at alpha=0.05.

**Table S2.** Description of maternal DP consumption in the study populations <sup>1</sup>

|                                          | EDEN full cohort<br>( <i>n</i> = 1782) | Study populations                    |                                  |                                |
|------------------------------------------|----------------------------------------|--------------------------------------|----------------------------------|--------------------------------|
|                                          |                                        | Maternal blood<br>( <i>n</i> = 1754) | Cord blood<br>( <i>n</i> = 1337) | Colostrum<br>( <i>n</i> = 879) |
| DP consumption tertiles during pregnancy |                                        |                                      |                                  |                                |
| Low-consumer, g/d                        |                                        |                                      |                                  |                                |
| Higher-fat content DP                    | 23 ± 11                                | 24 ± 11                              | 24 ± 11                          | 25 ± 10                        |
| Lower-fat content DP                     | 169 ± 89                               | 169 ± 89                             | 165 ± 91                         | 173 ± 87                       |
| Moderate consumer, g/d                   |                                        |                                      |                                  |                                |
| Higher-fat content DP                    | 58 ± 11                                | 58 ± 11                              | 58 ± 11                          | 59 ± 11                        |
| Lower-fat content DP                     | 431 ± 76                               | 431 ± 76                             | 430 ± 76                         | 430 ± 75                       |
| Heavy consumer, g/d                      |                                        |                                      |                                  |                                |
| Higher-fat content DP                    | 153 ± 86                               | 153 ± 86                             | 155 ± 86                         | 151 ± 81                       |
| Lower-fat content DP                     | 815 ± 229                              | 814 ± 230                            | 829 ± 236                        | 806 ± 215                      |

<sup>1</sup> Values are the mean ± SD.

**Table S3.** Description of maternal RBC membrane, cord RBC membrane and colostrum fatty acids <sup>1</sup>.

|                              | Maternal blood<br>( <i>n</i> = 1754) | Cord blood<br>( <i>n</i> = 1337) | Colostrum<br>( <i>n</i> = 879) |
|------------------------------|--------------------------------------|----------------------------------|--------------------------------|
| C15:0, % total fat           | 0.17 ± 0.03                          | 0.12 ± 0.03                      | 0.42 ± 0.07                    |
| C17:0, % total fat           | 0.31 ± 0.04                          | 0.32 ± 0.08                      | 0.27 ± 0.05                    |
| C18:3 n-3 (ALA), % total fat | 0.10 ± 0.03                          | 0.05 ± 0.03                      | 0.65 ± 0.21                    |
| C20:6 n-3 (DHA), % total fat | 5.32 ± 0.94                          | 6.21 ± 0.91                      | 0.64 ± 0.19                    |
| n-3 PUFAs, % total fat       | 7.80 ± 1.20                          | 7.06 ± 1.06                      | 2.05 ± 0.41                    |
| C18:2 n-6 (LA), % total fat  | 7.15 ± 0.81                          | 2.89 ± 0.44                      | 9.83 ± 1.83                    |
| C20:4 n-6 (AA), % total fat  | 12.87 ± 0.82                         | 15.30 ± 0.90                     | 0.86 ± 0.16                    |
| n-6 PUFAs, % total fat       | 25.63 ± 1.35                         | 26.23 ± 1.11                     | 12.18 ± 1.89                   |
| n-6:n-3 LC-PUFA ratio        | 2.5 ± 0.5                            | 3.4 ± 0.6                        | 1.8 ± 0.4                      |

<sup>1</sup> Values are the mean ± SD.

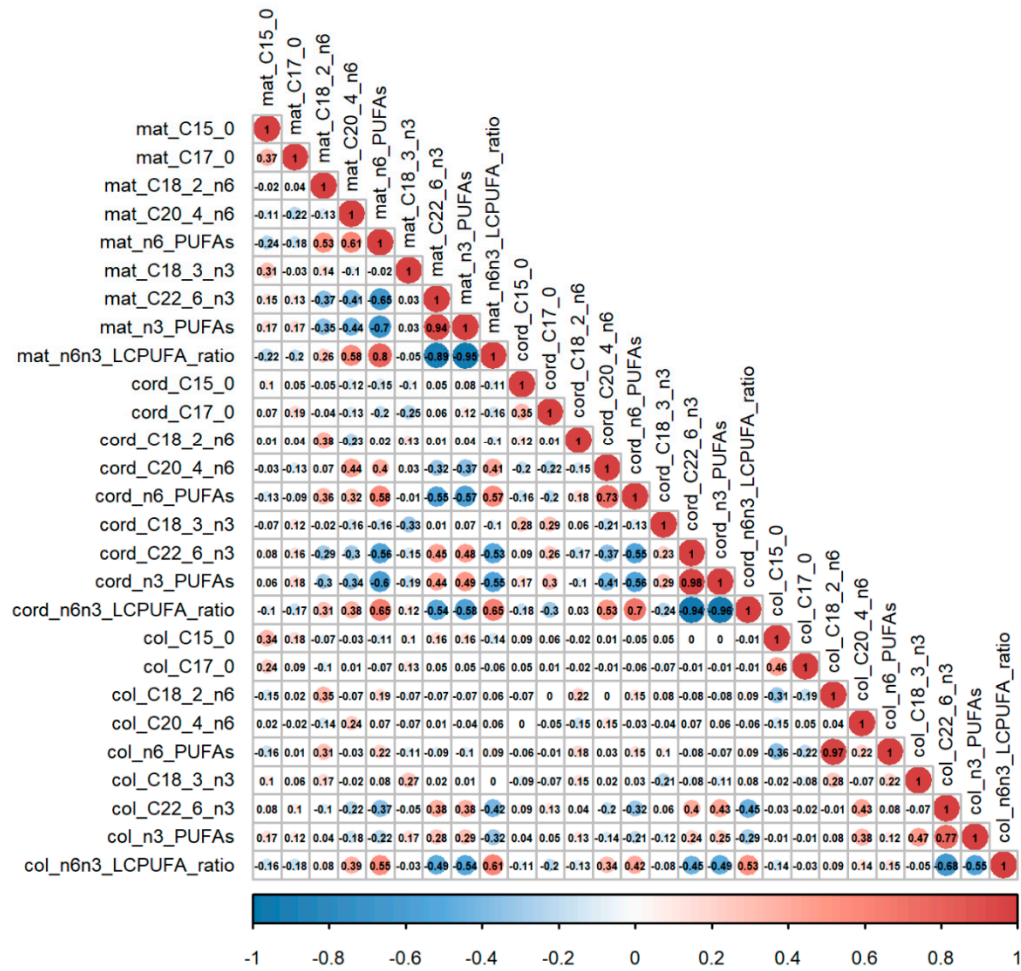

**Figure S1.** Heatmap of the Pearson's correlation between perinatal biofluids fatty acids concentration. Prefixes "mat\_", "cord\_", and "col" indicate maternal RBC membrane, cord RBC membrane and colostrum, respectively. Numbers in the cells are Pearson's correlation coefficient  $r$ . The size of the circle inside each cell represent the magnitude of the correlation.

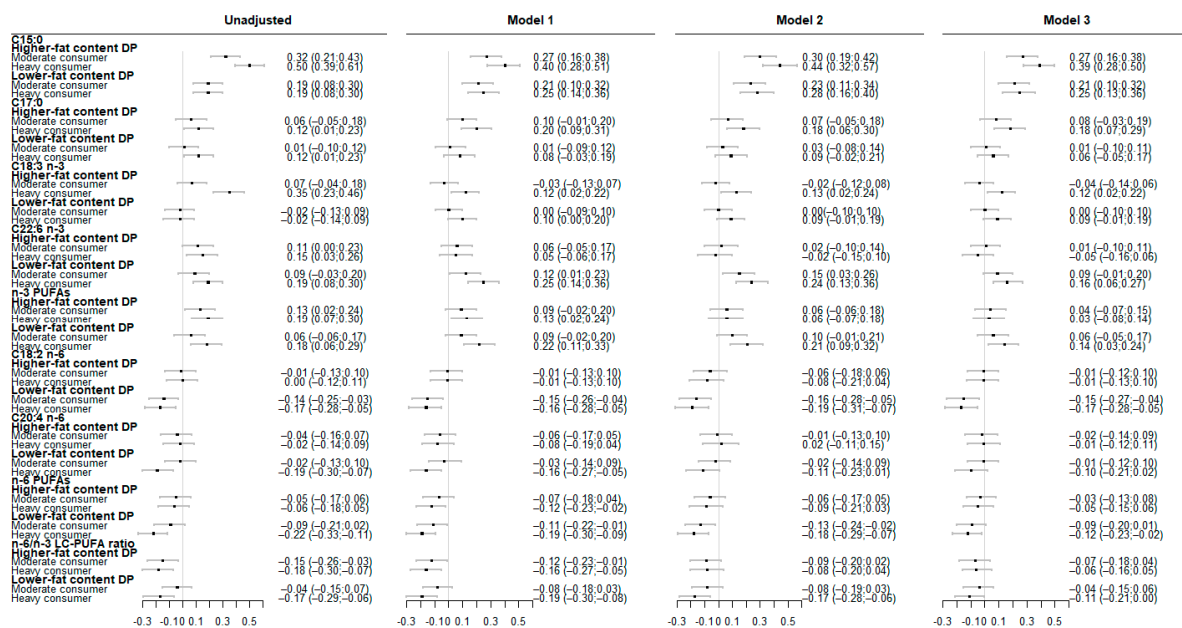

**Figure S2.** Associations between maternal higher-fat and lower-fat content DP consumption tertiles and fatty acids levels in maternal RBC membrane ( $\beta$  (95%CI)). Results are from linear regression models. Model 1 was adjusted on study center and maternal age at delivery. Model 2 was adjusted on model 1 covariates and on maternal “healthy” dietary pattern during pregnancy. Model 3 was adjusted on model 1 covariates and on the frequency of fish consumption during pregnancy. Higher-fat and lower-fat content DP consumption tertiles were studied simultaneously within each model.

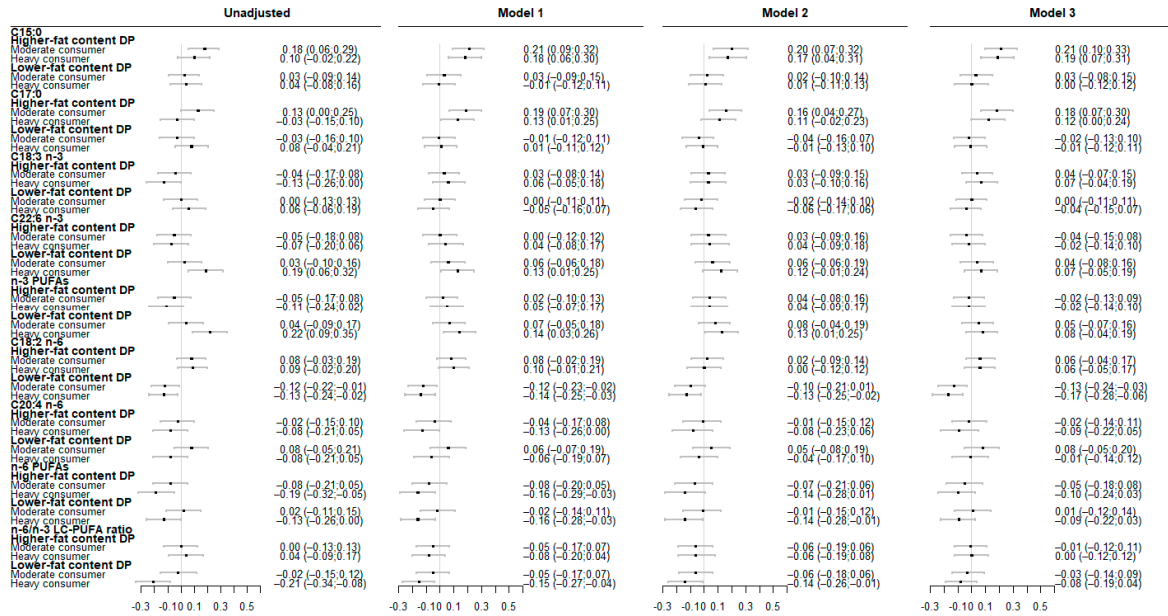

**Figure S3.** Associations between maternal higher-fat and lower-fat content DP consumption tertiles and fatty acids levels in cord RBC membrane ( $\beta$  (95%CI)). Results are from linear regression models. Model 1 was adjusted on study center and maternal age at delivery. Model 2 was adjusted on model 1 covariates and on maternal “healthy” dietary pattern during pregnancy. Model 3 was adjusted on model 1 covariates and on the frequency of fish consumption during pregnancy. Higher-fat and lower-fat content DP consumption tertiles were studied simultaneously within each model.

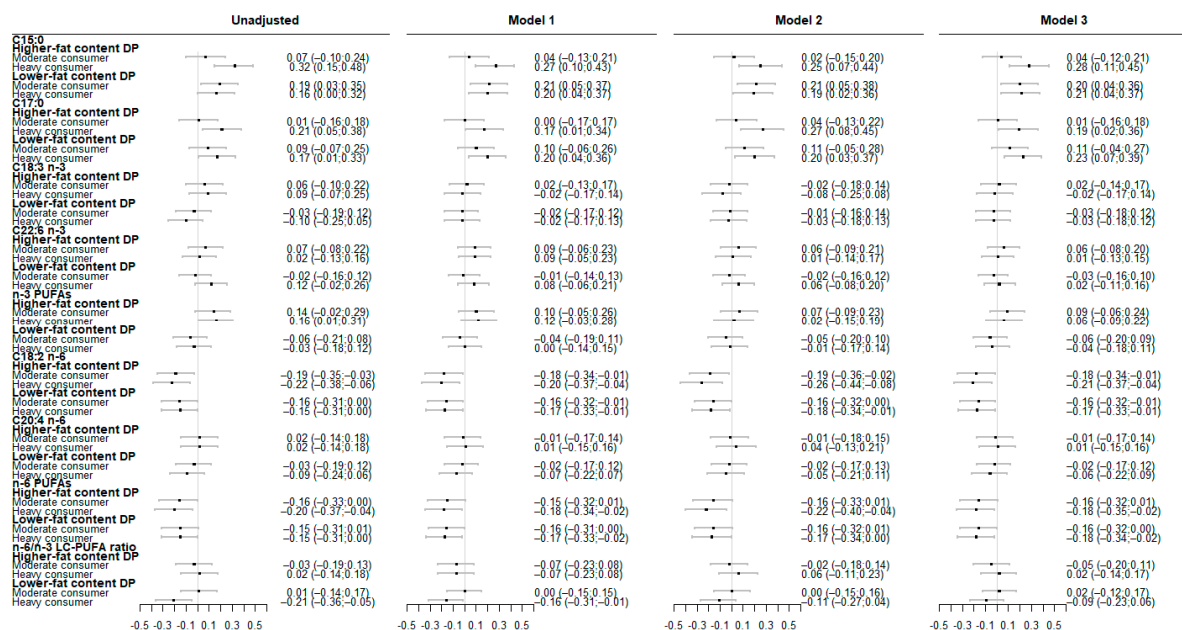

**Figure S4.** Associations between maternal higher-fat and lower-fat content DP consumption tertiles and fatty acids levels in colostrum ( $\beta$  (95%CI)). Results are from linear regression models. Model 1 was adjusted on study center and maternal age at delivery. Model 2 was adjusted on model 1 covariates and on maternal “healthy” dietary pattern during pregnancy. Model 3 was adjusted on model 1 covariates and on the frequency of fish consumption during pregnancy. Higher-fat and lower-fat content DP consumption tertiles were studied simultaneously within each model.
